# Supplementary material for: Searching the second hit in patients with inherited retinal dystrophies and monoallelic variants in ABCA4, USH2A and CEP290 by whole-gene targeted sequencing
Source: PubMed Central journal article supplement (PMC6127285; doi:10.1038/s41598-018-31511-5), 2018-09-06
Supplement: 41598_2018_31511_MOESM1_ESM.pdf [file 41598_2018_31511_MOESM1_ESM.pdf]

## SUPPLEMENTARY INFORMATION

---

### Searching the second hit in patients with inherited retinal dystrophies and monoallelic variants in *ABCA4*, *USH2A* and *CEP290* by whole-gene targeted sequencing

María González-del Pozo<sup>a,b,#</sup>, Marta Martín-Sánchez<sup>a,#</sup>, Nereida Bravo-Gil<sup>a,b</sup>, Cristina Méndez-Vidal<sup>a,b</sup>, Ángel Chimenea<sup>a</sup>, Enrique Rodríguez-de la Rúa<sup>c,d</sup>, Salud Borrego<sup>a,b</sup> and Guillermo Antiñolo<sup>a,b\*</sup>

<sup>a</sup>Department of Maternofetal Medicine, Genetics and Reproduction, Institute of Biomedicine of Seville, University Hospital Virgen del Rocío/CSIC/University of Seville, Seville, Spain.

<sup>b</sup>Centro de Investigación Biomédica en Red de Enfermedades Raras (CIBERER), Seville, Spain.

<sup>c</sup>Department of Ophthalmology, University Hospital Virgen Macarena, Seville, Spain.

<sup>d</sup>Retics Patología Ocular. OFTARED. Instituto de Salud Carlos III. Spain.

<sup>#</sup>These authors contributed equally to this work.

**\*Corresponding author:**

Guillermo Antiñolo, MD, PhD

Department of Maternofetal Medicine, Genetics and Reproduction

University Hospital Virgen del Rocío

Avenida Manuel Siurot s/n

41013, Seville. Spain

E-mail: [guillermo.antinolo.sspa@juntadeandalucia.es](mailto:guillermo.antinolo.sspa@juntadeandalucia.es);

Phone: + 34 955 012 772

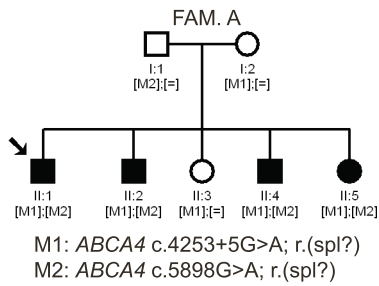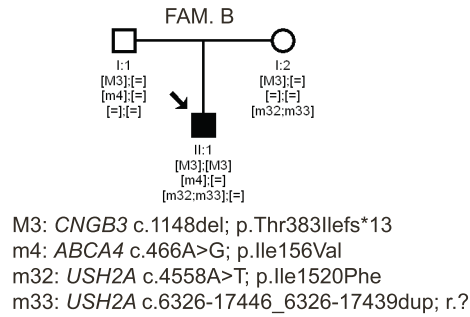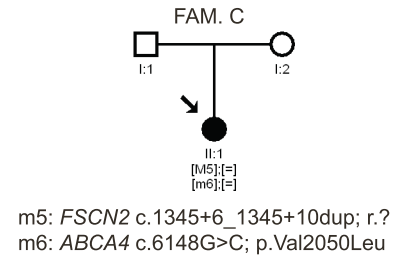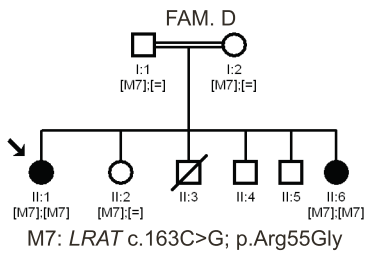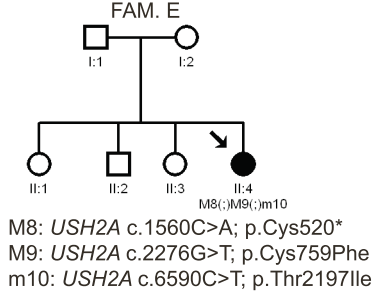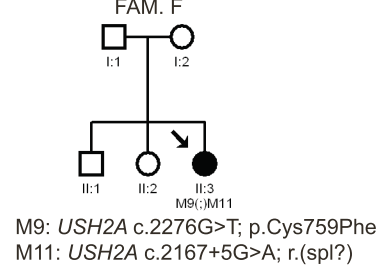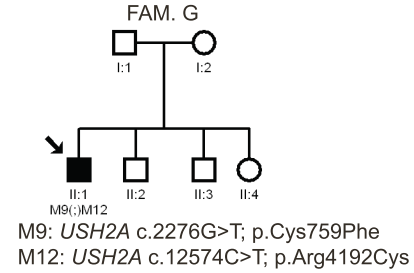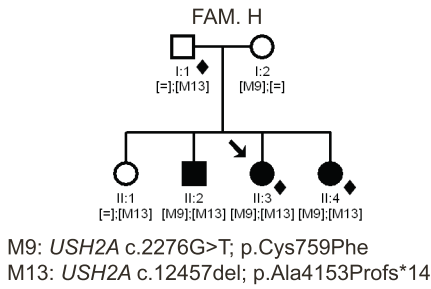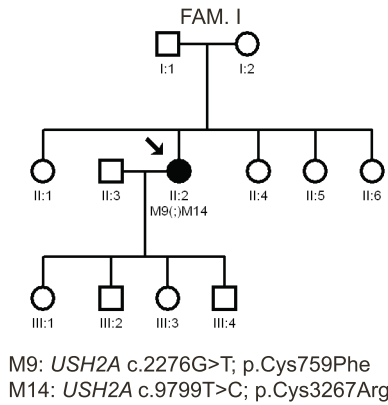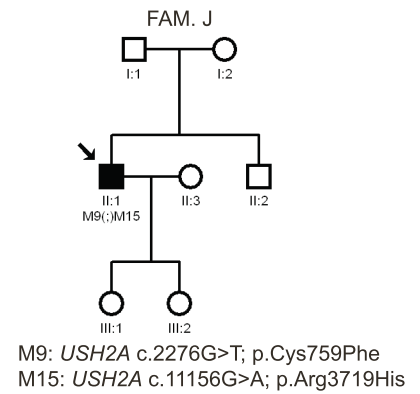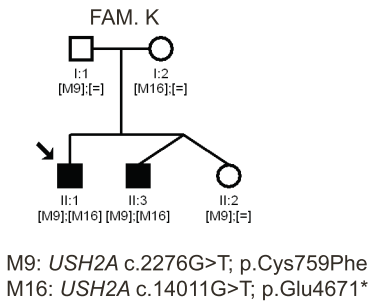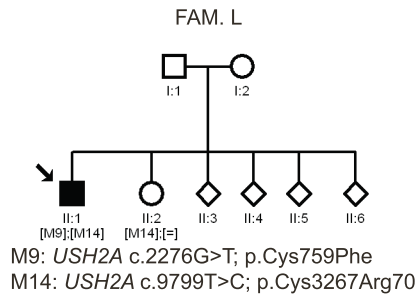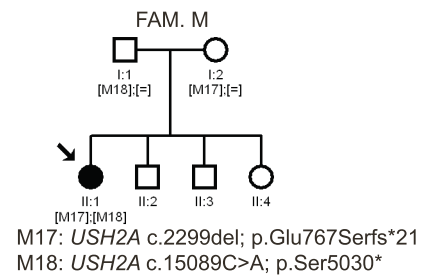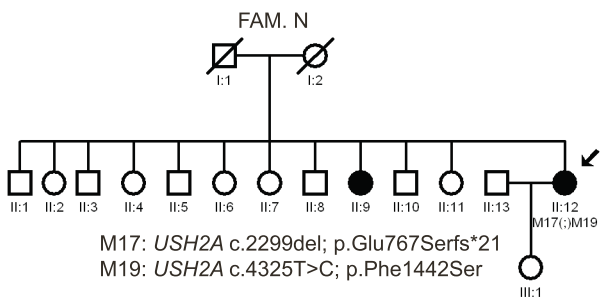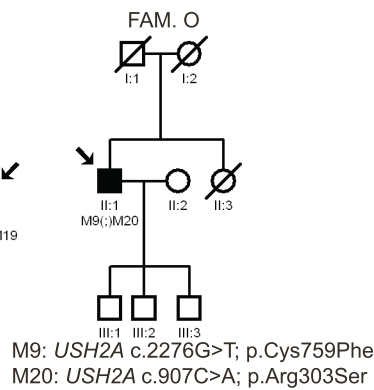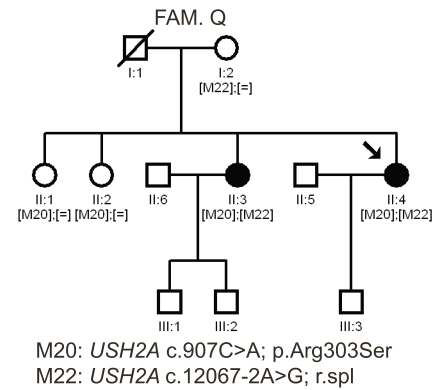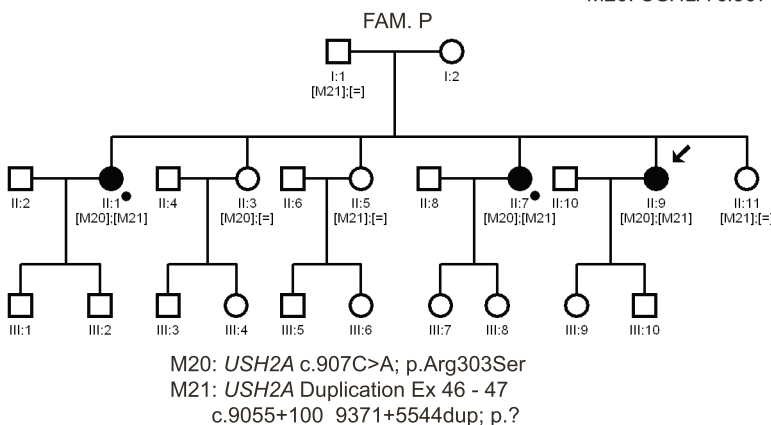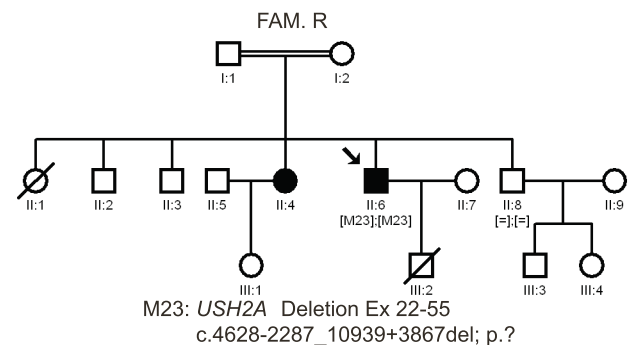

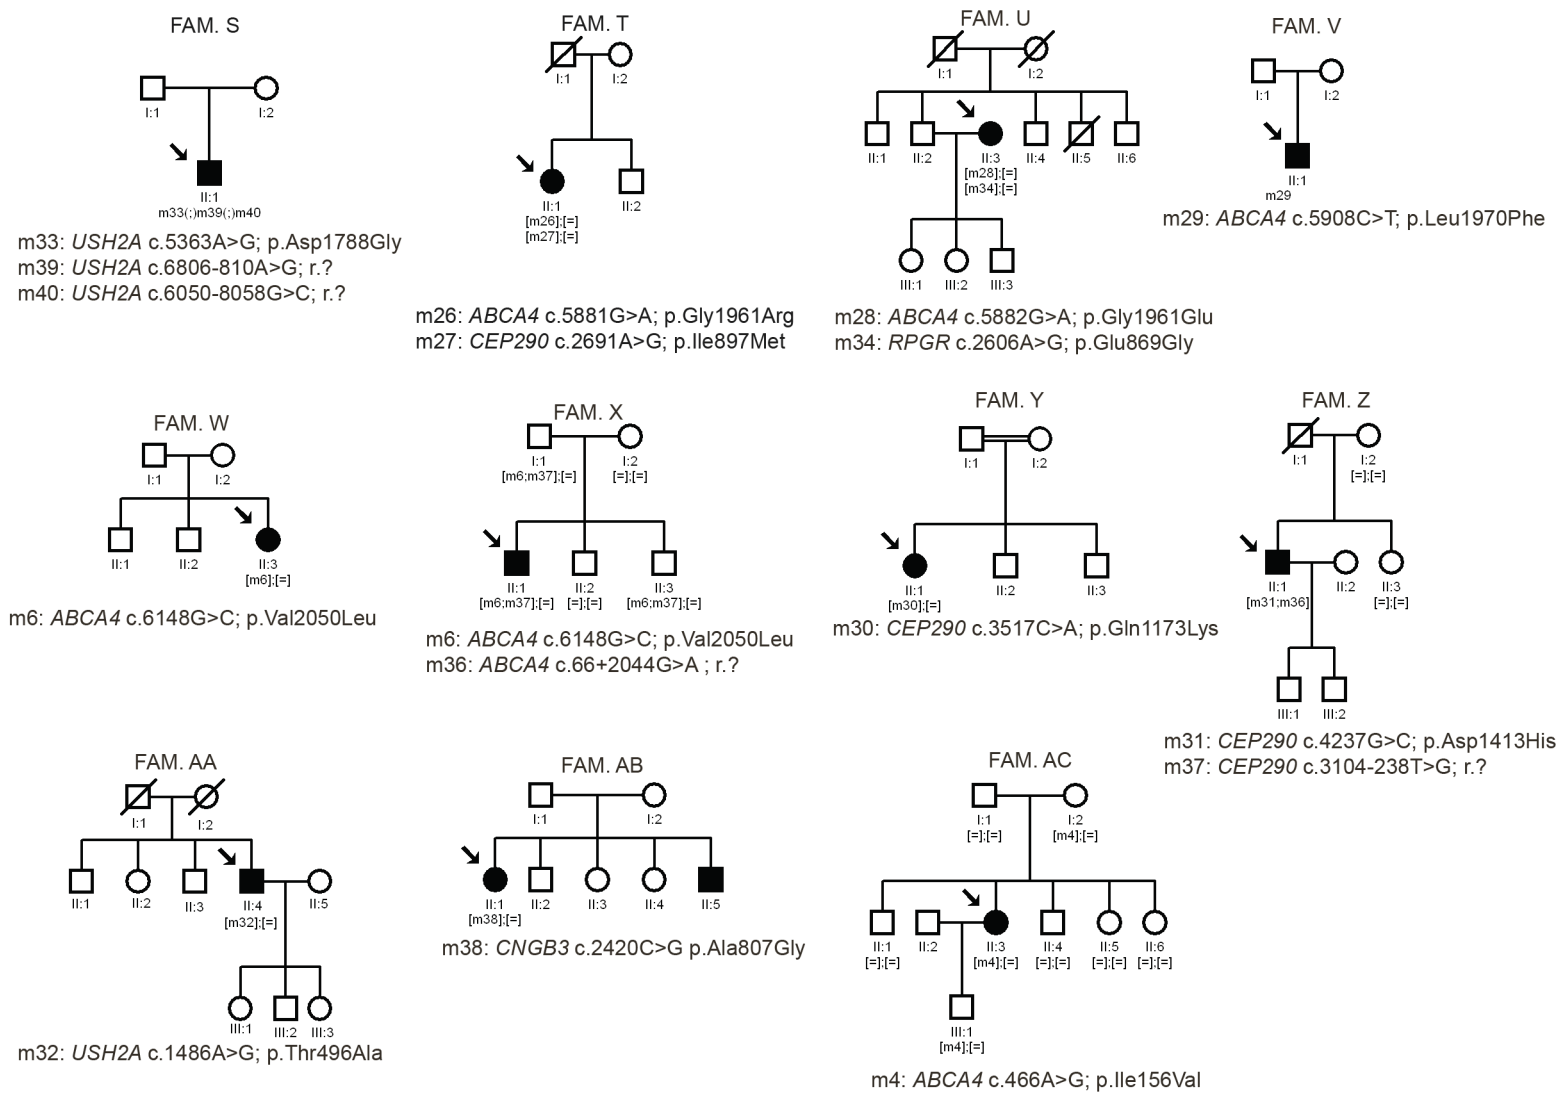

**Supplementary Figure S1. Pedigrees of the 29 families included in the study.** Variants coded by a upper case 'M' are considered likely causal whereas variants coded by a lower case 'm' have no demonstrated association with the disease in these patients. Symbols have been used to indicate intra-familial variability: diamond symbols in family H refers to individuals with hearing loss; individuals in family P with arRP are indicated with a small black circle symbol, whereas the index patient have Usher syndrome.

**Supplementary Table S1: Uncovered regions in *USH2A*, *ABCA4* and *CEP290*.** The 41 studied regions (38 in *USH2A*, one in *ABCA4* and two in *CEP290*) lay within introns. Percentages of uncover introns are shown below.

| <b><i>USH2A</i> (NM_206933)</b>  | <b>Region (bp)</b> | <b>Localization</b> | <b>Intron lenght (bp)</b> | <b>uncovered intron (%)</b> | <b>uncovered intron (total %)</b> |
|----------------------------------|--------------------|---------------------|---------------------------|-----------------------------|-----------------------------------|
| chr1:215875496-215876307         | 811                | intron 61-62        | 47653                     | 1,7                         | 1,86                              |
| chr1:215877262-215877335         | 73                 | intron 61-62        | 47653                     | 0,15                        |                                   |
| chr1:215926381-215926903         | 522                | intron 58-59        | 15259                     | 3,42                        | 3,42                              |
| chr1:215976558-215978259         | 1701               | intron 49-50        | 14610                     | 11,64                       | 12,25                             |
| chr1:215985250-215985338         | 88                 | intron 49-50        | 14610                     | 0,6                         |                                   |
| chr1:216014671-216014996         | 325                | intron 46-47        | 6190                      | 5,25                        | 7,22                              |
| chr1:216015690-216015812         | 122                | intron 46-47        | 6190                      | 1,97                        |                                   |
| chr1:216024163-216024662         | 499                | intron 44-45        | 20973                     | 2,38                        | 4,67                              |
| chr1:216025381-216025512         | 131                | intron 44-45        | 20973                     | 0,62                        |                                   |
| chr1:216026737-216026963         | 226                | intron 44-45        | 20973                     | 1,08                        |                                   |
| chr1:216029429-216029552         | 123                | intron 44-45        | 20973                     | 0,59                        |                                   |
| chr1:216084979-216085170         | 191                | intron 38-39        | 33710                     | 0,57                        | 0,81                              |
| chr1:216089199-216089281         | 82                 | intron 38-39        | 33710                     | 0,24                        |                                   |
| chr1:216124625-216126490         | 1865               | intron 37-38        | 30521                     | 6,11                        | 6,11                              |
| chr1:216151086-216151177         | 91                 | intron 35-36        | 22243                     | 0,41                        | 0,41                              |
| chr1:216181754-216182540         | 786                | intron 32-33        | 45868                     | 1,71                        | 5,23                              |
| chr1:216185233-216185313         | 80                 | intron 32-33        | 45868                     | 0,17                        |                                   |
| chr1:216185339-216185595         | 256                | intron 32-33        | 45868                     | 0,56                        |                                   |
| chr1:216185884-216186886         | 1002               | intron 32-33        | 45868                     | 2,18                        |                                   |
| chr1:216189165-216189429         | 264                | intron 32-33        | 45868                     | 0,58                        |                                   |
| chr1:216203588-216203597         | 9                  | intron 32-33        | 45868                     | 0,02                        |                                   |
| chr1:216277723-216278182         | 459                | intron 21-22        | 78038                     | 0,59                        | 6,56                              |
| chr1:216303681-216303997         | 316                | intron 21-22        | 78038                     | 0,4                         |                                   |
| chr1:216319183-216319755         | 572                | intron 21-22        | 78038                     | 0,73                        |                                   |
| chr1:216320424-216322533         | 2109               | intron 21-22        | 78038                     | 2,7                         |                                   |
| chr1:216323328-216324400         | 1072               | intron 21-22        | 78038                     | 1,37                        |                                   |
| chr1:216325472-216325809         | 337                | intron 21-22        | 78038                     | 0,43                        |                                   |
| chr1:216330496-216330753         | 257                | intron 21-22        | 78038                     | 0,33                        |                                   |
| chr1:216458207-216458271         | 64                 | intron 11-12        | 38181                     | 0,17                        | 0,41                              |
| chr1:216459028-216459102         | 74                 | intron 11-12        | 38181                     | 0,19                        |                                   |
| chr1:216459727-216459744         | 17                 | intron 11-12        | 38181                     | 0,04                        |                                   |
| chr1:216478193-216478484         | 291                | intron 9-10         | 29512                     | 0,99                        | 1,43                              |
| chr1:216478607-216478737         | 130                | intron 9-10         | 29512                     | 0,44                        |                                   |
| chr1:216513169-216513199         | 30                 | intron 4-5          | 37298                     | 0,08                        | 5,4                               |
| chr1:216513371-216515356         | 1985               | intron 4-5          | 37298                     | 5,32                        |                                   |
| chr1:216543674-216543722         | 48                 | intron 3-4          | 53428                     | 0,09                        | 0,24                              |
| chr1:216559922-216559977         | 55                 | intron 3-4          | 53428                     | 0,1                         |                                   |
| chr1:216578264-216578289         | 25                 | intron 3-4          | 53428                     | 0,05                        |                                   |
| <b><i>ABCA4</i> (NM_000350)</b>  | <b>Region (bp)</b> | <b>Localization</b> | <b>Intron lenght (bp)</b> | <b>uncovered intron (%)</b> | <b>uncovered intron (total %)</b> |
| chr1:94540023-94540628           | 605                | intron 11-12        | 14372                     | 4,21                        | 4,21                              |
| <b><i>CEP290</i> (NM_025114)</b> | <b>Region (bp)</b> | <b>Localization</b> | <b>Intron lenght (bp)</b> | <b>uncovered intron (%)</b> | <b>uncovered intron (total %)</b> |
| chr12:88492109-88492138          | 29                 | intron 26-27        | 5838                      | 0,5                         | 0,5                               |
| chr12:88526846-88527217          | 371                | intron 6-7          | 5424                      | 6,84                        | 6,84                              |

**Supplementary Table S2: Genomic regions of each gene included in the targeted-panel design.** In *ABCA4*, *CEP290* and *USH2A*, chromosome coordinates are given, as they are included as entire genes. Regarding the 76 remaining genes, exons coded by a specific transcript (NM reference sequence) were contained in the final design. Additionally, two deep-intronic mutations were also added: *OFD1* (c.935+706A>G) and *PRPF31* (c.1374+654C>G). \* Genes not included in previous panels.

| <b>Gen</b>         | <b>Genomic Regions</b>      |
|--------------------|-----------------------------|
| <i>ABCA4</i>       | chr1:94,458,393-94,586,688  |
| <i>ABHD12</i>      | NM_015600                   |
| <i>ACBD5*</i>      | NM_145698                   |
| <i>AIPL1</i>       | NM_014336                   |
| <i>ARL6</i>        | NM_177976                   |
| <i>BBS1</i>        | NM_024649                   |
| <i>BBS10</i>       | NM_024685                   |
| <i>BBS12</i>       | NM_152618                   |
| <i>BBS2</i>        | NM_031885                   |
| <i>BEST1</i>       | NM_001139443                |
| <i>C1QTNF5*</i>    | NM_015645                   |
| <i>C2ORF71</i>     | NM_001029883                |
| <i>CA4</i>         | NM_000717                   |
| <i>CDH23/USH1D</i> | NM_022124                   |
| <i>CDHR1*</i>      | NM_033100                   |
| <i>CEP290</i>      | chr12:88,442,793-88,535,993 |
| <i>CERKL</i>       | NM_201548                   |
| <i>CHM</i>         | NM_000390                   |
| <i>CLRN1</i>       | NM_001195794                |
| <i>CNGA1</i>       | NM_001142564                |
| <i>CNGB1*</i>      | NM_001297                   |
| <i>CNGB3</i>       | NM_019098                   |
| <i>CRB1</i>        | NM_201253                   |
| <i>CRX</i>         | NM_000554                   |
| <i>DFNB31</i>      | NM_015404                   |
| <i>EYS</i>         | NM_001142800                |
| <i>FSCN2</i>       | NM_001077182                |
| <i>GPR98</i>       | NM_032119                   |
| <i>GUCA1A</i>      | NM_000409                   |
| <i>GUCA1B*</i>     | NM_002098                   |
| <i>GUCY2D</i>      | NM_000180                   |
| <i>IMPDH1</i>      | NM_000883                   |
| <i>LCA5</i>        | NM_001122769                |
| <i>LRAT</i>        | NM_004744                   |
| <i>MERTK</i>       | NM_006343                   |
| <i>MKKS</i>        | NM_170784                   |
| <i>MYO7A</i>       | NM_000260                   |

|                       |                              |
|-----------------------|------------------------------|
| NMNAT1                | NM_022787                    |
| NR2E3                 | NM_016346                    |
| NRL                   | NM_006177                    |
| OFD1                  | NM_003611                    |
| PCDH15/USH1F          | NM_001142763                 |
| PDE6A*                | NM_000440                    |
| PDE6B                 | NM_000283                    |
| PDZD7*                | NM_001195263                 |
| PEX6*                 | NM_000287                    |
| PRCD*                 | NM_001077620                 |
| PROM1                 | NM_006017                    |
| PRPF3                 | NM_004698                    |
| PRPF31                | NM_015629                    |
| PRPF8                 | NM_006445                    |
| PRPH2                 | NM_000322                    |
| PRPS1*                | NM_002764                    |
| RAB28*                | NM_001017979                 |
| RBP3                  | NM_002900                    |
| RD3                   | NM_001164688                 |
| RDH12                 | NM_152443                    |
| RGR                   | NM_002921                    |
| RHO                   | NM_000539                    |
| RLBP1                 | NM_000326                    |
| ROM1                  | NM_000327                    |
| RP1                   | NM_006269                    |
| RP2                   | NM_006915                    |
| RP9                   | NM_203288                    |
| RPE65                 | NM_000329                    |
| RPGR                  | NM_001034853                 |
| RPGRIP1               | NM_020366                    |
| RS1                   | NM_000330                    |
| SAG                   | NM_000541                    |
| SAMD11                | NM_152486                    |
| SNRNP200              | NM_014014                    |
| SYNE2                 | NM_182914                    |
| TOPORS                | NM_005802                    |
| TULP1                 | NM_003322                    |
| USH1C/DFNB18/harmonin | NM_153676                    |
| USH1G/SANS            | NM_173477                    |
| USH2A                 | chr1:215,796,236-216,596,738 |
| VCAN*                 | NM_004385                    |
| ZNF408                | NM_001184751                 |
